# Supplementary material for: Anti-CXCL4 Antibody Reactivity Is Present in Systemic Sclerosis (SSc) and Correlates with the SSc Type I Interferon Signature
Source: PubMed Central journal article supplement (PMC7404208; doi:10.3390/ijms21145102), 2020-07-19
Supplement: ijms-21-05102-s001.pdf [file ijms-21-05102-s001.pdf]

## Supplementary Materials

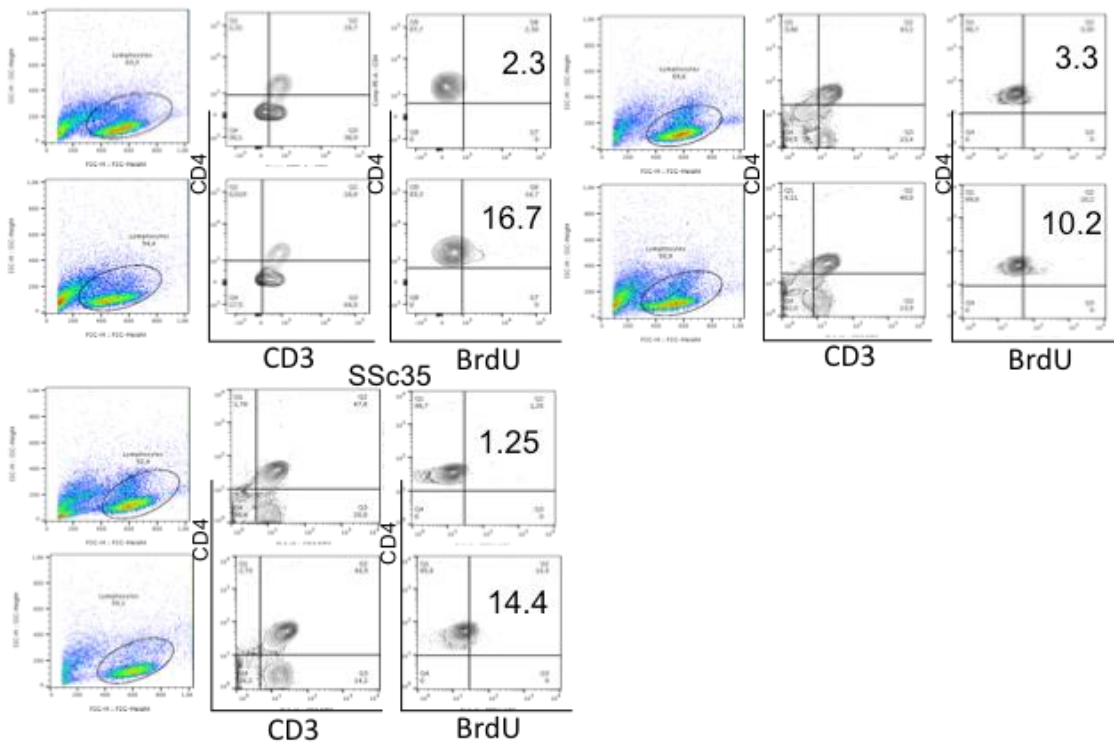

**Figure S1.** Gating strategy for T-cell proliferation assays. PBMCs were cultured for 5 days in the presence of CXCL4 (5 mg/mL) or were untreated. Percent of proliferation (% of BrdU incorporation, BrdU) is shown on the gated CD4+CD3+ cells in the T-lymphocytes gate. Percent of BrdU incorporation is reported on the contour plots on the right. Cells were analyzed by flow cytometry.

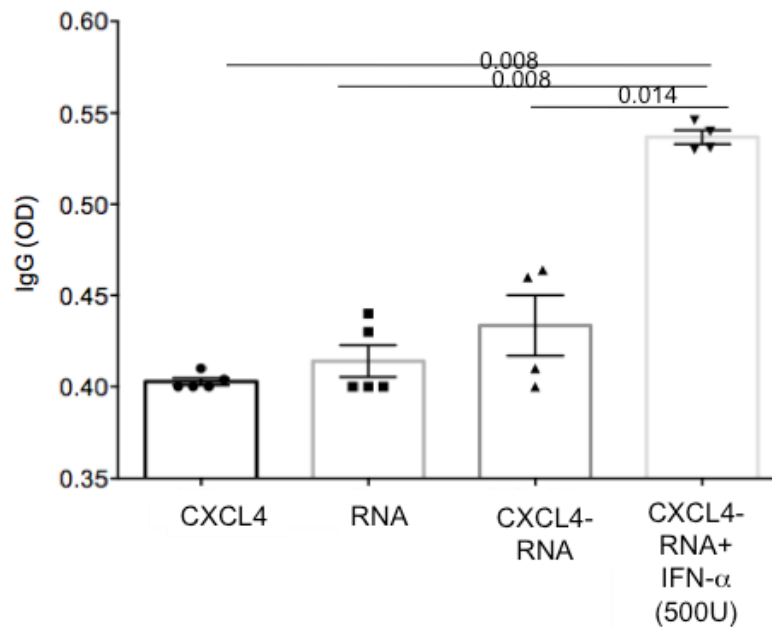

**Figure S2.** Treatment of B-cells with CXCL4-RNA complexes and IFN- $\alpha$  significantly increases antibody release in supernatants of B-cells. B-cells were treated as indicated for 7 days and concentration of antibodies (IgG) was tested by ELISA. Results reported as OD of different experiments. Horizontal bars are the means, vertical bars standard error of the means,  $p$  values by Mann-Whitney test.

**Table S1.** Clinical characteristics of the studied cohorts.

| <b>Patients</b>                                    | <b>SSc1 (35)</b> | <b>SSc2 (32)</b> | <b>SLE1 (19)</b> | <b>SLE2 (16)</b> | <b>UC (48)</b> | <b>HD (50)</b> |
|----------------------------------------------------|------------------|------------------|------------------|------------------|----------------|----------------|
| Age, mean (range) years                            | 58 (28–71)       | 53 (39–61)       | 47 (25–70)       | 48 (34–69)       | 48 (20–77)     | 50 (26–58)     |
| Sex (M/F):                                         | 2/33             | 1/30             | 2/17             | 1/16             | 35/23          | 11/19          |
| Disease duration with range:                       |                  |                  |                  |                  |                |                |
| Months                                             | 99.6<br>(12–600) | 135<br>(1–455)   | 48<br>(12–500)   | 40<br>(12–425)   | 144<br>(0–432) | N/A            |
| SLEDAI                                             | N/A              | N/A              | 9 (0–18)         | N/A              | N/A            | N/A            |
| Form (limited/diffuse)                             | 14/21            | 5/27             | N/A              | N/A              | N/A            | N/A            |
| Early limited/early diffuse                        | 9/7              | 3/10             | N/A              | N/A              | N/A            | N/A            |
| EScSGAI                                            | 2.77 (1–8)       | 1.9 (1–4.5)      | N/A              | N/A              | N/A            | N/A            |
| mRSS (mean, range)                                 | 11.6 (0–22)      | 13.1 (0–36)      | N/A              | N/A              | N/A            | N/A            |
| ESR (mean, range)                                  | 24.9 (2–75)      | 22.3 (2–64)      | N/A              | N/A              | N/A            | N/A            |
| Other clinical and laboratory characteristics (%): |                  |                  |                  |                  |                |                |
| ANA positivity                                     | 94%              | 84%              | N/A              | N/A              | N/A            | N/A            |
| ACA positivity                                     | 57%              | 21%              | N/A              | N/A              | N/A            | N/A            |
| ATA positivity                                     | 31%              | 62%              | N/A              | N/A              | N/A            | N/A            |
| aRNAP3 positivity                                  | 6%               | 3%               | N/A              | N/A              | N/A            | N/A            |
| CRP positive                                       | 20%              | 12%              | N/A              | N/A              | N/A            | N/A            |
| ERS >30                                            | 23%              | 25%              | N/A              | N/A              | N/A            | N/A            |
| Raynaud Phenomenon                                 | 100%             | 100%             | N/A              | N/A              | N/A            | N/A            |
| DU                                                 | 56%              | 60%              | N/A              | N/A              | N/A            | N/A            |
| Teleangectasia                                     | N/A              | 50%              | N/A              | N/A              | N/A            | N/A            |
| Pulmonary Arterial Hypertension                    | 14%              | N/A              | N/A              | N/A              | N/A            | N/A            |
| Lung fibrosis (yes/no)                             | 12/20            | 15/12            | N/A              | N/A              | N/A            | N/A            |
| DLCO (%) (mean)                                    | 70%              | 54%              | N/A              | N/A              | N/A            | N/A            |
| DLCO <80%                                          | 54%              | 66%              | N/A              | N/A              | N/A            | N/A            |
| Gastrointestinal involvement                       | 51%              | 59%              | N/A              | N/A              | N/A            | N/A            |
| Synovitis                                          | 33%              | 50%              | N/A              | N/A              | N/A            | N/A            |
| Tendon friction rubs                               | 40%              | 35%              | N/A              | N/A              | N/A            | N/A            |
| CK elevation                                       | 34%              | 6%               | N/A              | N/A              | N/A            | N/A            |
| DMARDs                                             | 80%              | 80%              | 60%              | -                | -              | N/A            |

DU and synovitis were clinically defined, disease duration refers to the time from the onset of the first non-Raynaud's phenomenon manifestation. ACA, anti-centromere antibody; ANA, anti-nuclear antibodies; ATA, anti-topoisomerase-I antibody; aRNAP3, anti-RNA polymerase III; CK, creatine kinase; DU, digital ulcer; ILD, interstitial lung disease, defined by high resolution computed tomography; DMARDs, disease modifying antirheumatic drugs; mRSS, modified Rodnan skin score; N/A, not applicable; SSc, systemic sclerosis; HD healthy donors, SLE, systemic lupus erythematosus; UC: ulcerative colitis patients; ESR, erythrocyte sedimentation rate; CRP, c-reactive protein; DLCO, diffusion lung CO.

**Table S2.** CXCL4 protein contains sequences that bind the most diffuse HLA-DR alleles in Caucasians and can be potentially presented to T helper cells.

| <b>Potential Immunogenic Epitopes in Cxcl4 Sequence.</b> |                |                           |
|----------------------------------------------------------|----------------|---------------------------|
| <b>aa Pos.</b>                                           | <b>Alleles</b> | <b>15aa Sequence</b>      |
| 19                                                       | DRB1_0401      | <b>VRPRHITSLEVIKAG</b> WB |
| 20                                                       | DRB1_0401      | <b>RPRHITSLEVIKAGP</b> SB |
| 21                                                       | DRB1_0401      | <b>PRHITSLEVIKAGPH</b> SB |
| 22                                                       | DRB1_0401      | <b>RHITSLEVIKAGPHC</b> WB |
| 19                                                       | DRB1_0101      | <b>VRPRHITSLEVIKAG</b> WB |
| 20                                                       | DRB1_0101      | <b>RPRHITSLEVIKAGP</b> SB |
| 21                                                       | DRB1_0101      | <b>PRHITSLEVIKAGPH</b> SB |
| 22                                                       | DRB1_0101      | <b>RHITSLEVIKAGPHC</b> WB |
| 19                                                       | DRB1_1101      | <b>VRPRHITSLEVIKAG</b> WB |
| 20                                                       | DRB1_1101      | <b>RPRHITSLEVIKAGP</b> WB |
| 21                                                       | DRB1_1101      | <b>PRHITSLEVIKAGPH</b> WB |
| 22                                                       | DRB1_1101      | <b>RHITSLEVIKAGPHC</b> WB |
| 36                                                       | DRB1_1101      | <b>CPTAQLIATLKNGRK</b> WB |
| 37                                                       | DRB1_1101      | <b>PTAQLIATLKNGRKI</b> WB |
| 55                                                       | DRB1_1101      | <b>LQALLYKKIIEHLE</b> WB  |
| 56                                                       | DRB1_1101      | <b>QALLYKKIIEHLES</b> WB  |
| 55                                                       | DRB1_1101      | <b>LQALLYKKIIEHLE</b> WB  |
| 56                                                       | DRB1_1101      | <b>QALLYKKIIEHLES</b> WB  |

The server <http://www.cbs.dtu.dk/services/NetMHCIIpan/> estimated the possible 15 amino acid (aa) long over-lapping peptide sequences, contained in CXCL4, which bind the most common HLA-ClassII alleles DRB1\*0401, DRB1\*0101, DRB1\*1101. WB = week binder, SB = strong binder.
